# Supplementary material
Source: MDPI journal article supplement (https://www.mdpi.com/2673-7167/1/1/4)
Supplement: s1 [file s1]

Article

# Supplementary Materials: Vibrational Analysis of Benziodoxoles and Benzi-dazolotetrazoles

Seth Yannacone <sup>1</sup>, Kapil Dev Sayala <sup>1</sup>, Marek Freindorf <sup>1</sup>, Nicolay V. Tsarevsky <sup>1</sup>, and Elfi Kraka <sup>1,\*</sup>

<sup>1</sup> Affiliation 1; Department of Chemistry, Southern Methodist University, 3215 Daniel Avenue, Dallas, TX 75275-0314, USA; syannacone@smu.edu (S.Y.); ksayala@smu.edu (K.D.S.); mfreindorf@smu.edu (M.F.); nvt@smu.edu (N.V.T.);

\* Correspondence: ekraka@smu.edu; Tel.: +1-214-768-2611

Version April 26, 2021 submitted to Journal Not Specified

## Contents

|   |                                                                 |   |
|---|-----------------------------------------------------------------|---|
| 1 | Single Crystal X-ray Crystallography of I-Hydroxybenziodoxolone | 1 |
|   | References                                                      | 4 |

## 1. Single Crystal X-ray Crystallography of I-Hydroxybenziodoxolone

Data were collected on a Rigaku XtaLAB Synergy-*i* Kappa diffractometer equipped with a PhotonJet-*i* X-ray source operated at 50 W (50kV, 1 mA) to generate Cu K $\alpha$  radiation ( $\lambda = 1.54178 \text{ \AA}$ ) and a HyPix-6000HE HPC detector. Crystals were transferred from the vial and placed on a glass slide in type NVH immersion oil by Cargille. A Zeiss Stemi 305 microscope was used to identify a suitable specimen for X-ray diffraction from a representative sample of the material. The crystal and a small amount of the oil were collected on a MiTeGen 50 micron MicroLoop and transferred to the instrument where it was placed under a cold nitrogen stream (Oxford 700 series) maintained at 100 K throughout the duration of the experiment. The sample was optically centered with the aid of a video camera to insure that no translations were observed as the crystal was rotated through all positions. A unit cell collection was then carried out. After it was determined that the unit cell was not present in the CCDC database, a data collection strategy was calculated by CrysAlis<sup>Pro</sup>[1]. The crystal was measured for size, morphology, and color.

**Refinement details.** After data collection, the unit cell was re-determined using a subset of the full data collection. Intensity data were corrected for Lorentz, polarization, and background effects using the CrysAlis<sup>Pro</sup>[1]. A numerical absorption correction was applied based on a Gaussian integration over a multifaceted crystal and followed by a semi-empirical correction for adsorption applied using the program SCALE3 ABSPACK[2]. The programs SHELXT[3] was used for the initial structure solution and SHELXL[4] was used for refinement of the structure. Both of these programs were utilized within the OLEX2 software [5]. Hydrogen atoms bound to carbon atoms were located in the difference Fourier map and were geometrically constrained using the appropriate AFIX commands. The hydrogen atom (H3) was constrained to ride on oxygen O3 with a constrained O-H bond length of 0.86(2)  $\text{\AA}$ .

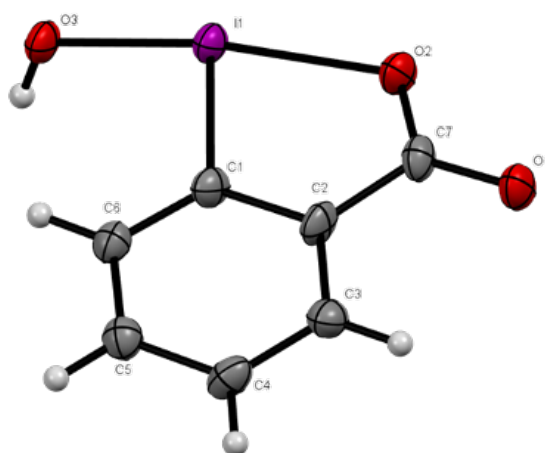

**Figure S1.** Displacement ellipsoid plot (50% probability level) of I-hydroxybenzidoxolone at 100.0(3)K. C, H, O, and I atoms are represented by gray, white, red, and purple ellipsoids, respectively.

**Table S1.** Crystal data and structure refinement.

|                                                |                                                                |
|------------------------------------------------|----------------------------------------------------------------|
| Identification code                            | run21_02                                                       |
| Empirical formula                              | C <sub>7</sub> H <sub>5</sub> IO <sub>3</sub>                  |
| Formula weight                                 | 264.01                                                         |
| Temperature/K                                  | 100.0(3)                                                       |
| Crystal system                                 | monoclinic                                                     |
| Space group                                    | P2 <sub>1</sub> /c                                             |
| a/Å                                            | 12.8748(4)                                                     |
| b/Å                                            | 4.0112(2)                                                      |
| c/Å                                            | 14.0072(4)                                                     |
| $\alpha/^\circ$                                | 90                                                             |
| $\beta/^\circ$                                 | 96.656(3)                                                      |
| $\gamma/^\circ$                                | 90                                                             |
| Volume/Å <sup>3</sup>                          | 718.50(5)                                                      |
| Z                                              | 4                                                              |
| $\rho_{\text{calc}}/\text{g cm}^{-3}$          | 2.441                                                          |
| $\mu/\text{mm}^{-1}$                           | 34.652                                                         |
| F(000)                                         | 496                                                            |
| Crystal size/mm <sup>3</sup>                   | 0.151 × 0.036 × 0.017                                          |
| Radiation                                      | Cu K $\alpha$ ( $\lambda$ = 1.54184)                           |
| 2 $\theta$ range for data collection/ $^\circ$ | 12.726 to 153.976                                              |
| Index ranges                                   | -16 ≤ h ≤ 16, -4 ≤ k ≤ 4, -16 ≤ l ≤ 17                         |
| Reflections collected                          | 8790                                                           |
| Independent reflections                        | 1437 [ $R_{\text{int}}$ = 0.0699, $R_{\text{sigma}}$ = 0.0341] |
| Data/restraints/parameters                     | 1437/1/104                                                     |
| Goodness-of-fit on F <sup>2</sup>              | 1.098                                                          |
| Final R indexes [I ≥ 2 $\sigma$ (I)]           | $R_1$ = 0.0565, $wR_2$ = 0.1539                                |
| Final R indexes [all data]                     | $R_1$ = 0.0600, $wR_2$ = 0.1582                                |
| Largest diff. peak/hole / e Å <sup>-3</sup>    | 2.07/-3.04                                                     |

**Table S2.** Fractional Atomic Coordinates ( $\times 10^4$ ) and Equivalent Isotropic Displacement Parameters ( $\text{\AA}^2 \times 10^3$ ).  $U_{eq}$  is defined as 1/3 of the trace of the orthogonalised  $U_{IJ}$  tensor.

| Atom | x        | y          | z         | U(eq)    |
|------|----------|------------|-----------|----------|
| I1   | 881.1(2) | 3742.2(10) | 6489.1(2) | 22.5(3)  |
| O1   | 2323(4)  | 2774(15)   | 3909(3)   | 28.6(10) |
| O2   | 1165(3)  | 2251(14)   | 4975(3)   | 26.2(9)  |
| O3   | 905(4)   | 5656(13)   | 7790(3)   | 26.6(11) |
| C1   | 2358(5)  | 5777(16)   | 6352(5)   | 23.3(13) |
| C2   | 2716(5)  | 5250(20)   | 5452(4)   | 25.0(13) |
| C3   | 3686(5)  | 6464(16)   | 5299(5)   | 26.1(15) |
| C4   | 4296(6)  | 8172(18)   | 6034(5)   | 27.9(14) |
| C5   | 3907(6)  | 8669(15)   | 6923(5)   | 26.1(16) |
| C6   | 2930(5)  | 7502(19)   | 7086(4)   | 24.0(12) |
| C7   | 2039(5)  | 3338(16)   | 4719(4)   | 23.9(14) |

**Table S3.** Anisotropic Displacement Parameters ( $\text{\AA}^2 \times 10^3$ ). The Anisotropic displacement factor exponent takes the form:  $-2\pi^2[h^2a^{*2}U_{11} + 2hka^*b^*U_{12} + \dots]$ .

| Atom | $U_{11}$ | $U_{22}$ | $U_{33}$ | $U_{23}$ | $U_{13}$ | $U_{12}$ |
|------|----------|----------|----------|----------|----------|----------|
| I1   | 22.8(4)  | 28.6(5)  | 17.1(4)  | 0.65(11) | 6.1(2)   | 1.19(12) |
| O1   | 30(2)    | 39(3)    | 18(2)    | 0(2)     | 5.5(16)  | -2(2)    |
| O2   | 26(2)    | 36(3)    | 18.6(19) | 1(2)     | 7.4(16)  | -2(2)    |
| O3   | 28(2)    | 37(3)    | 16(2)    | 0.5(17)  | 8.4(17)  | 5.3(19)  |
| C1   | 23(3)    | 31(4)    | 17(3)    | 5(2)     | 6(2)     | 2(2)     |
| C2   | 28(3)    | 32(4)    | 17(3)    | 3(3)     | 11(2)    | 3(3)     |
| C3   | 22(3)    | 32(4)    | 23(3)    | 2(2)     | 2(3)     | 3(2)     |
| C4   | 25(3)    | 27(4)    | 34(4)    | -1(3)    | 12(3)    | -1(3)    |
| C5   | 28(4)    | 27(4)    | 23(3)    | 0(2)     | 2(3)     | 1(2)     |
| C6   | 27(3)    | 24(4)    | 21(3)    | 0(3)     | 6(2)     | 2(3)     |
| C7   | 32(3)    | 25(4)    | 14(3)    | 1(2)     | 4(2)     | 2(2)     |

**Table S4.** Bond Lengths.

| Atom | Atom | Length/ $\text{\AA}$ | Atom | Atom | Length/ $\text{\AA}$ |
|------|------|----------------------|------|------|----------------------|
| I1   | O2   | 2.274(4)             | C1   | C6   | 1.379(9)             |
| I1   | O3   | 1.975(4)             | C2   | C3   | 1.381(9)             |
| I1   | C1   | 2.098(7)             | C2   | C7   | 1.481(9)             |
| O1   | C7   | 1.252(7)             | C3   | C4   | 1.400(10)            |
| O2   | C7   | 1.296(8)             | C4   | C5   | 1.409(10)            |
| C1   | C2   | 1.408(8)             | C5   | C6   | 1.386(10)            |

**Table S5.** Bond Angles.

| Atom | Atom | Atom | Angle/ $^\circ$ | Atom | Atom | Atom | Angle/ $^\circ$ |
|------|------|------|-----------------|------|------|------|-----------------|
| O3   | I1   | O2   | 167.52(19)      | C3   | C2   | C7   | 123.0(5)        |
| O3   | I1   | C1   | 90.9(2)         | C2   | C3   | C4   | 119.9(7)        |
| C1   | I1   | O2   | 76.8(2)         | C3   | C4   | C5   | 119.5(7)        |
| C7   | O2   | I1   | 114.1(4)        | C6   | C5   | C4   | 121.4(7)        |
| C2   | C1   | I1   | 114.7(5)        | C1   | C6   | C5   | 117.6(6)        |
| C6   | C1   | I1   | 122.5(4)        | O1   | C7   | O2   | 122.9(6)        |
| C6   | C1   | C2   | 122.8(6)        | O1   | C7   | C2   | 120.8(6)        |
| C1   | C2   | C7   | 118.2(6)        | O2   | C7   | C2   | 116.2(5)        |
| C3   | C2   | C1   | 118.8(6)        |      |      |      |                 |

**Table S6.** Torsion Angles.

| A  | B  | C  | D  | Angle/ $^{\circ}$ | A  | B  | C  | D  | Angle/ $^{\circ}$ |
|----|----|----|----|-------------------|----|----|----|----|-------------------|
| I1 | O2 | C7 | O1 | -179.6(5)         | C2 | C3 | C4 | C5 | -0.8(10)          |
| I1 | O2 | C7 | C2 | 1.9(7)            | C3 | C2 | C7 | O1 | -0.8(10)          |
| I1 | C1 | C2 | C3 | -179.3(5)         | C3 | C2 | C7 | O2 | 177.7(7)          |
| I1 | C1 | C2 | C7 | -0.5(8)           | C3 | C4 | C5 | C6 | 0.0(10)           |
| I1 | C1 | C6 | C5 | 178.5(5)          | C4 | C5 | C6 | C1 | 1.2(10)           |
| C1 | C2 | C3 | C4 | 0.4(10)           | C6 | C1 | C2 | C3 | 0.9(11)           |
| C1 | C2 | C7 | O1 | -179.5(7)         | C6 | C1 | C2 | C7 | 179.6(6)          |
| C1 | C2 | C7 | O2 | -1.0(9)           | C7 | C2 | C3 | C4 | -178.3(6)         |
| C2 | C1 | C6 | C5 | -1.6(11)          |    |    |    |    |                   |

**Table S7.** Hydrogen Atom Coordinates ( $\text{\AA} \times 10^3$ ) and Isotropic Displacement Parameters ( $\text{\AA}^2 \times 10^4$ ).

| Atom | x        | y         | z        | U(eq) |
|------|----------|-----------|----------|-------|
| H3   | 1320(50) | 4440(170) | 8170(50) | 32    |
| H3A  | 3939.31  | 6143.56   | 4694.76  | 31    |
| H4   | 4968.17  | 8988.53   | 5935.12  | 33    |
| H5   | 4322.6   | 9829.51   | 7420.29  | 31    |
| H6   | 2663.27  | 7876.58   | 7681.54  | 29    |

## References

1. CrysAlisPro. Oxford Diffraction Ltd., 2018.
2. SCALE3 ABSPACK. Oxford Diffraction Ltd., 2005.
3. Sheldrick, G.M. Crystal structure refinement with SHELXL. *Acta Crystallogr.* **2015**, *C71*, 3–8.
- 30 4. Sheldrick, G.M. SHELXT – Integrated space-group and crystal-structure determination. *Acta Crystallogr.* **2015**, *A71*, 3–8.
5. Dolomanov, O.V.; Bourhis, L.J.; Gildea, R.J.; Howard, J.A.K.; Puschmann, H. OLEX2: a complete structure solution, refinement and analysis program. *J. Appl. Cryst.* **2009**, *42*, 339–341.

© 2021 by the authors. Submitted to *Journal Not Specified* for possible open access  
 35 publication under the terms and conditions of the Creative Commons Attribution (CC BY) license (<http://creativecommons.org/licenses/by/4.0/>).
